# Supplementary material
Source: PubMed Central journal article supplement (PMC6291699)
Supplement: ajtr0010-3782-f8.pdf [file ajtr0010-3782-f8.pdf]

## Prognosis of NX stage differentiated thyroid cancer

### Supplemental Table 1. AJCC Cancer Staging Manual, 6th Edition: Protocol for Differentiated Thyroid Carcinoma

---

#### AJCC Staging Protocol for DTC, 6th Edition

---

##### Primary tumor (T)

Note: All categories may be subdivided: (a) solitary tumor, (b) multifocal (the largest determines the classification).

TX Primary tumor cannot be assessed

T0 No evidence of primary tumor

T1 Tumor 2 cm or less in greatest dimension limited to the thyroid

T2 Tumor more than 2 cm but not more than 4 cm in greatest dimension limited to the thyroid

T3 Tumor more than 4 cm in greatest dimension limited to the thyroid or any tumor with minimal extrathyroid extension (e.g., extension to the sternothyroid muscle or perithyroid soft tissues)

T4a Tumor of any size extending beyond the thyroid capsule to invade subcutaneous soft tissues, larynx, trachea, esophagus, or recurrent laryngeal nerve

T4b Tumor invades prevertebral fascia or encases carotid artery or mediastinal vessels

##### Regional nodes (N)

Regional lymph nodes are the central compartment, lateral cervical, and upper mediastinal lymph nodes.

NX Regional lymph nodes cannot be assessed

N0 No regional node metastasis

N1 Regional node involvement

N1a Nodal metastasis to level VI (pretracheal, paratracheal, and prelaryngeal/Delphian lymph nodes)

N1b Metastasis to unilateral, bilateral, or contralateral cervical or cervical or superior mediastinal lymph nodes

##### Distant metastasis (M)

MX Distant metastasis cannot be assessed

M0 No distant metastasis

M1 Distant metastasis

---

#### AJCC Staging grouping

---

##### For patients < 45 years

|         |       |       |    |
|---------|-------|-------|----|
| Stage I | Any T | Any N | M0 |
|---------|-------|-------|----|

|          |       |       |    |
|----------|-------|-------|----|
| Stage II | Any T | Any N | M1 |
|----------|-------|-------|----|

##### For patients ≥ 45 years

|         |    |    |    |
|---------|----|----|----|
| Stage I | T1 | N0 | M0 |
|---------|----|----|----|

|          |    |    |    |
|----------|----|----|----|
| Stage II | T2 | N0 | M0 |
|----------|----|----|----|

|           |    |    |    |
|-----------|----|----|----|
| Stage III | T3 | N0 | M0 |
|-----------|----|----|----|

|  |    |     |    |
|--|----|-----|----|
|  | T1 | N1a | M0 |
|--|----|-----|----|

|  |    |     |    |
|--|----|-----|----|
|  | T2 | N1a | M0 |
|--|----|-----|----|

|  |    |     |    |
|--|----|-----|----|
|  | T3 | N1a | M0 |
|--|----|-----|----|

|           |     |    |    |
|-----------|-----|----|----|
| Stage IVa | T4a | N0 | M0 |
|-----------|-----|----|----|

|  |     |     |    |
|--|-----|-----|----|
|  | T4a | N1a | M0 |
|--|-----|-----|----|

|  |    |     |    |
|--|----|-----|----|
|  | T1 | N1b | M0 |
|--|----|-----|----|

|  |    |     |    |
|--|----|-----|----|
|  | T2 | N1b | M0 |
|--|----|-----|----|

|  |    |     |    |
|--|----|-----|----|
|  | T3 | N1b | M0 |
|--|----|-----|----|

|  |     |     |    |
|--|-----|-----|----|
|  | T4a | N1b | M0 |
|--|-----|-----|----|

|           |     |       |    |
|-----------|-----|-------|----|
| Stage IVb | T4b | Any N | M0 |
|-----------|-----|-------|----|

|           |       |       |    |
|-----------|-------|-------|----|
| Stage IVc | Any T | Any N | M1 |
|-----------|-------|-------|----|

---

## Prognosis of NX stage differentiated thyroid cancer

**Supplemental Table 2.** AJCC Cancer Staging Manual, 7th Edition: Protocol for Differentiated Thyroid Carcinoma

---

AJCC Staging Protocol for DTC, 7th Edition

---

Primary tumor (T)

- TX Primary tumor cannot be assessed
- T0 No evidence of primary tumor
- T1 ≤ 2 cm, limited to the thyroid
  - T1a ≤ 1 cm
  - T1b > 1 cm and ≤ 2 cm
- T2 > 2 cm and ≤ 4 cm, limited to the thyroid
- T3 > 4 cm, limited to the thyroid or any tumor with minimal extra-thyroid extension (e.g., to the sternothyroid muscle or perithyroid soft tissues)
  - T4a Tumor of any size extending beyond the thyroid capsule to invade subcutaneous soft tissues, larynx, trachea, esophagus, or recurrent laryngeal nerve
  - T4b Tumor invades prevertebral fascia or encases carotid artery or mediastinal vessels

Regional nodes (N)

- NX Regional lymph nodes cannot be assessed
- N0 No regional node metastasis
- N1 Regional node involvement
  - N1a Nodal metastasis to level VI (pretracheal, paratracheal, and prelaryngeal/Delphian lymph nodes)
  - N1b Nodal metastasis to unilateral, bilateral, or contralateral cervical (Levels I, II, III, IV, or V) or retropharyngeal or cervical or superior mediastinal lymph nodes (Level VII)

Distant metastasis (M)

- M0 No distant metastasis
  - M1 Distant metastasis
- 

AJCC Staging grouping

---

For patients < 45 years

|          |       |       |    |
|----------|-------|-------|----|
| Stage I  | Any T | Any N | M0 |
| Stage II | Any T | Any N | M1 |

For patients ≥ 45 years

|           |       |       |    |
|-----------|-------|-------|----|
| Stage I   | T1    | N0    | M0 |
| Stage II  | T2    | N0    | M0 |
| Stage III | T3    | N0    | M0 |
|           | T1-3  | N1a   | M0 |
| Stage IVa | T4a   | N0-1a | M0 |
|           | T1-4a | N1b   | M0 |
| Stage IVb | T4b   | Any N | M0 |
| Stage IVc | Any T | Any N | M1 |

---
